# Supplementary material
Source: PubMed Central journal article supplement (PMC3743965)
Supplement: NIHMS202706-supplement-5.pdf [file NIHMS202706-supplement-5.pdf]

**Table S1. Primers used for semi-quantitative PCR analysis.**

| <b>Gene</b> | <b>Accession Number</b> | <b>Region amplified (aa)</b> | <b>Size of product (bp)</b> | <b>Primer sequence</b>                                          |
|-------------|-------------------------|------------------------------|-----------------------------|-----------------------------------------------------------------|
| HOXA1       | U10421                  | 511 to 663                   | 153                         | F: 5' CTGGCCCTGGCTACGTATAA 3'<br>R: 5' TCCAACCTTCCCTGTTTTGG 3'  |
| HOXA2       | NM_006735               | 1027 to 1202                 | 176                         | F: 5' TTCAGCAAATGCCCTCTCT 3'<br>R: 5' TAGGCCAGCTCCACAGTTCT 3'   |
| HOXA3       | NM_030661               | 1525 to 1751                 | 227                         | F: 5' ACCTGTGATAGTGGGCTTGG 3'<br>R: 5' ATACAGCCATTCCAGCAACC 3'  |
| HOXA4       | NM_002141               | 633 to 903                   | 271                         | F: 5' CCCTGGATGAAGAAGATCCA 3'<br>R: 5' AATTGGAGGATCGCATCTTG 3'  |
| HOXA5       | NM_019102               | 796 to 988                   | 193                         | F: 5' CCGGAGAATGAAGTGGAAAA 3'<br>R: 5' ACGAGAACAGGGCTTCTTCA 3'  |
| HOXA6       | NM_024014               | 361 to 518                   | 158                         | F: 5' AAAGCACTCCATGACGAAGG 3'<br>R: 5' TCCTTCTCCAGCTCCAGTGT 3'  |
| HOXA7       | NM_006896               | 38 to 322                    | 285                         | F: 5' TGGTGTAATCTGGGGGTGT 3'<br>R: 5' TCTGATAAAGGGGGCTGTTG 3'   |
| HOXA9       | NM_152739               | 653 to 855                   | 203                         | F: 5' AATAACCCAGCAGCCAACTG 3'<br>R: 5' ATTTTCATCCTGCGGTTCTG 3'  |
| HOXA10      | NM_018951               | 1040 to 1198                 | 159                         | F: 5' ACACTGGAGCTGGAGAAGGA 3'<br>R: 5' GATCCGGTTTTCTCGATTCA 3'  |
| HOXA11      | NM_005523               | 800 to 1078                  | 279                         | F: 5' CGCTGCCCTATAACCAAGTA 3'<br>R: 5' GTCAAGGGCAAATCTGCAT 3'   |
| HOXA13      | NM_000522               | 1061 to 1236                 | 176                         | F: 5' GGATATCAGCCACGACGAAT 3'<br>R: 5' ATTATCTGGGCAAAGCAACG 3'  |
| HOXB1       | NM_002144               | 176 to 332                   | 157                         | F: 5' TTCAGCAGAACTCCGGCTAT 3'<br>R: 5' CCTCCGTCTCCTTCTGATTG 3'  |
| HOXB2       | NM_002145               | 9 to 267                     | 259                         | F: 5' CTCCCAAATCGCTCCATTA 3'<br>R: 5' GAAAGGAGGAGGAGGAGGAA 3'   |
| HOXB3       | NM_002146               | 1970 to 2268                 | 299                         | F: 5' TATGGCCTCAACCACCTTTC 3'<br>R: 5' AAGCCTGGGTACCACCTTCT 3'  |
| HOXB4       | NM_024015               | 593 to 747                   | 155                         | F: 5' TCTTGGAGCTGGAGAAGGAA 3'<br>R: 5' GTTGGGCAACTTGTGGTCTT 3'  |
| HOXB5       | NM_002147               | 1543 to 1731                 | 189                         | F: 5' AAGGCCTGGTCTGGGAGTAT 3'<br>R: 5' GCATCCACTCGCTCACTACA 3'  |
| HOXB6       | NM_156037               | 151 to 334                   | 184                         | F: 5' ATTTCTTCTGGCCCTCACT 3'<br>R: 5' GGAAGGTGGAGTTCACGAAA 3'   |
| HOXB7       | NM_004502               | 143 to 391                   | 249                         | F: 5' CAGCCTCAAGTTCGGTTTTTC 3'<br>R: 5' CGGAGAGGTTCTGCTCAAAG 3' |
| HOXB8       | NM_024016               | 964 to 1228                  | 265                         | F: 5' GTAGGCTTCAGCTGGGACTG 3'                                   |

|        |           |              |     |                                                                 |
|--------|-----------|--------------|-----|-----------------------------------------------------------------|
|        |           |              |     | R: 5' GGGAGCCTTTGCTTAAATCC 3'                                   |
| HOXB9  | NM_024017 | 533 to 730   | 198 | F: 5' TAATCAAAGACCCGGCTACG 3'<br>R: 5' CTACGGTCCCTGGTGAGGTA 3'  |
| HOXB13 | NM_006361 | 154 to 387   | 234 | F: 5' CTTGGATGGAGCCAAGGATA 3'<br>R: 5' CCGCCTCCAAAGTAACCATA 3'  |
| HOXC4  | NM_014620 | 1121 to 1396 | 276 | F: 5' CGCTCGAGGACAGCCTATAC 3'<br>R: 5' GCTCTGGGAGTGGTCTTCAG 3'  |
| HOXC5  | NM_019953 | 555 to 822   | 268 | F: 5' CAGTTACACGCGCTACCAGA 3'<br>R: 5' AGAGAGGAAAGGCGAAAAGG 3'  |
| HOXC6  | NM_004503 | 774 to 963   | 190 | F: 5' AAGAGGAAAAGCGGGAAGAG 3'<br>R: 5' GGTCCACGTTTGACTCCCTA 3'  |
| HOXC8  | NM_022658 | 390 to 539   | 150 | F: 5' CTCAGGCTACCAGCAGAACC 3'<br>R: 5' TTGGCGGAGGATTTACAGTC 3'  |
| HOXC9  | NM_006897 | 704 to 893   | 190 | F: 5' AGACGCTGGAAGTGGAGAAG 3'<br>R: 5' AGGCTGGGTAGGGTTTAGGA 3'  |
| HOXC10 | NM_017409 | 982 to 1270  | 289 | F: 5' CGCCTGGAGATTAGCAAGAC 3'<br>R: 5' GGTCCCTTGGAAGGAGAGTC 3'  |
| HOXC11 | NM_014212 | 353 to 538   | 186 | F: 5' CGGAACAGCTACTCCTCCTG 3'<br>R: 5' CAGGACGCTGTTCTTGTTGA 3'  |
| HOXC12 | NM_173860 | 654 to 833   | 180 | F: 5' CAAGCCCTATTCTGAAGTTGC 3'<br>R: 5' GCTTGCTCCCTCAACAGAAG 3' |
| HOXC13 | NM_017416 | 1840 to 2009 | 170 | F: 5' GTGGAAATCCAAGGAGGACA 3'<br>R: 5' TTGTTGAGGGACCCACTCTC 3'  |
| HOXD1  | NM_024501 | 929 to 1160  | 232 | F: 5' TTCAGCACCAAGCAACTGAC 3'<br>R: 5' TAGTGGGGGTTGTTCCAGAG 3'  |
| HOXD3  | NM_006898 | 492 to 667   | 176 | F: 5' CAGCCTCCTGGTCTGAACTC 3'<br>R: 5' ATCCAGGGGAAGATCTGCTT 3'  |
| HOXD4  | NM_014621 | 23 to 195    | 173 | F: 5' TCAAATGTGCCATAGCAAGC 3'<br>R: 5' TCCATAGGGCCCTCCTACTT 3'  |
| HOXD8  | NM_019558 | 1167 to 1456 | 290 | F: 5' TCAAATGTTTCCGTGGATGA 3'<br>R: 5' GCTCTTGGGCTTCCTTTTTTC 3' |
| HOXD9  | NM_014213 | 1803 to 2038 | 236 | F: 5' TCCCCATGTTTCTGAAAAG 3'<br>R: 5' GGGCTCCTCTAAGCCTCACT 3'   |
| HOXD10 | NM_002148 | 364 to 517   | 154 | F: 5' GTCCTTCACCACCAACATT 3'<br>R: 5' AAATATCCAGGGACGGGAAC 3'   |
| HOXD11 | NM_021192 | 302 to 554   | 253 | F: 5' GGGGCTACGCTCCCTACTAC 3'<br>R: 5' GCTGCCTCGTAGAACTGGTC 3'  |
| HOXD12 | NM_021193 | 113 to 313   | 201 | F: 5' CGCTTCCCCCTATCTCCTAC 3'<br>R: 5' CTTGGGGCGCATAGAACTTA 3'  |

|         |           |              |     |                                                                 |
|---------|-----------|--------------|-----|-----------------------------------------------------------------|
| HOXD13  | NM_000523 | 868 to 1132  | 265 | F: 5' GGGGATGTGGCTCTAAATCA 3'<br>R: 5' AACCTGGACCACATCAGGAG 3'  |
| GAPDH   | NM_002046 | 103 to 463   | 361 | F: 5' ATGGGGAAGGTGAAGGTCGGA 3'<br>R: 5' GAGATGATGACCCTTTTGGC 3' |
| FDXR    | J03826    | 601 to 827   | 227 | F: 5' TCCTACTGACCCACCTGAG 3'<br>R: 5' CTGGAGACCCAAGAAATCCA 3'   |
| TFRC    | M11507    | 1346 to 1524 | 179 | F: 5' AAAATCCGGTGTAGGCACAG 3'<br>R: 5' TTAAATGCAGGGACGAAAGG 3'  |
| MT2A    | BC070289  | 125 to 310   | 186 | F: 5' GCAAATGCAAAGAGTGCAAA 3'<br>R: 5' ATCCAGGTTTGTGGAAGTCG 3'  |
| P4HA1   | NM_000917 | 628 to 811   | 184 | F: 5' GGCAGCCAAAGCTCTGTTAC 3'<br>R: 5' GGCTTGTTCCATCCACAGTT 3'  |
| PSAP    | NM_002778 | 997 to 1149  | 153 | F: 5' TGGTGGAGCCCATTAAGAAG 3'<br>R: 5' GCTTCGAGCACATTTTGTCA 3'  |
| TM7SF2  | BC038353  | 552 to 775   | 224 | F: 5' CGCTTTCATCTTCAGCCTCT 3'<br>R: 5' GCTCTGCCTCCTTCATCAAC 3'  |
| GADD45A | NM_001924 | 197 to 355   | 158 | F: 5' GCCTGTGAGTGAGTGCAGAA 3'<br>R: 5' CCCCACCTTATCCATCCTTT 3'  |

---

\*aa = amino acids, \*\* bp = base pairs, F = forward primer, R = reverse primer, FDXR = Adrenodoxin reductase, MT2A = Metallothionein, P4H1 = prolyl 4-hydroxylase, alpha polypeptide I, PSAP = Prosaposin, TM7SF2 = Transmembrane superfamily member 2.
