# Supplementary material
Source: PubMed Central journal article supplement (PMC3743965)
Supplement: NIHMS202706-supplement-6.pdf [file NIHMS202706-supplement-6.pdf]

## Supplemental figure legends

### **Figure S1. QPCR analysis of the expression of *HOXA* and *HOXB* genes in malignant B cells.**

Expression of each *HOXA* and *HOXB* genes in the panel of myeloma cell lines was determined by semi-quantitative PCR. Expression is shown as a ratio to GAPDH expression.

### **Figure S2. QPCR analysis of the expression of *HOXC* and *HOXD* genes in malignant B cells.**

Expression of each *HOXC* and *HOXD* genes in the panel of myeloma cell lines was determined by semi-quantitative PCR. Expression is shown as a ratio to GAPDH expression. Note: the scale for the *HOXC* graph is much higher than the others, while the *HOXD* graph is much smaller.

### **Figure S.3. Morphology of malignant B cells treated with HXR9.**

Representative differential interference contrast (DIC) images of cells treated with 50  $\mu$ M CXR9 (left) or HXR9 (right) for 48h. Data are representative of two independent experiments and correspond to data shown in Figure 2B.

### **Figure S.4. Morphology of IM-9 cells showing the effects of caspase inhibition and iron**

**supplementation on the cytotoxicity of HXR9 and its combination with ch128.1Av.** Representative differential interference contrast (DIC) images of IM-9 cells treated with 2.5 nM ch128.1Av, 20  $\mu$ M HXR9, or their combination alone, pre-treated with 50  $\mu$ M ZVAD for 1 hour, or treated simultaneously with 25  $\mu$ M FAC. Data are representative of two independent experiments and correspond to the data shown in Figure 6.
