# Supplementary material
Source: PubMed Central journal article supplement (PMC3743965)

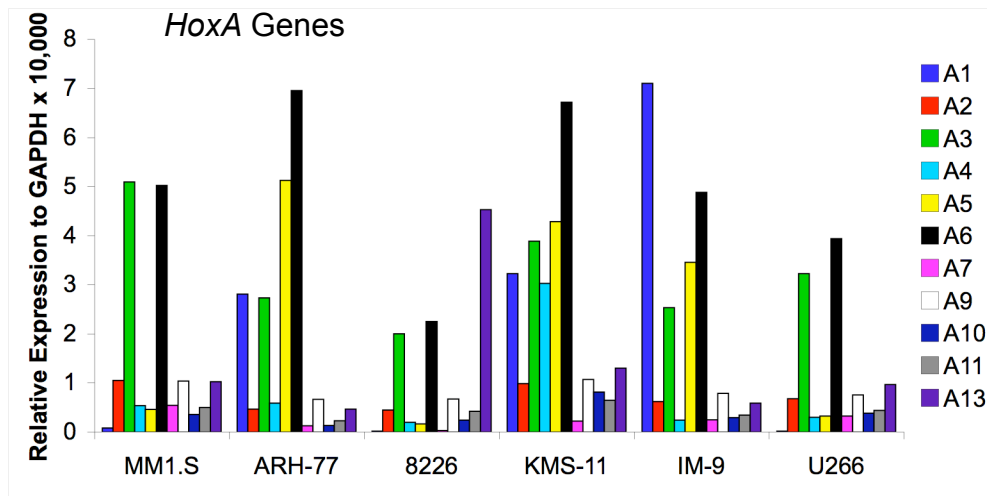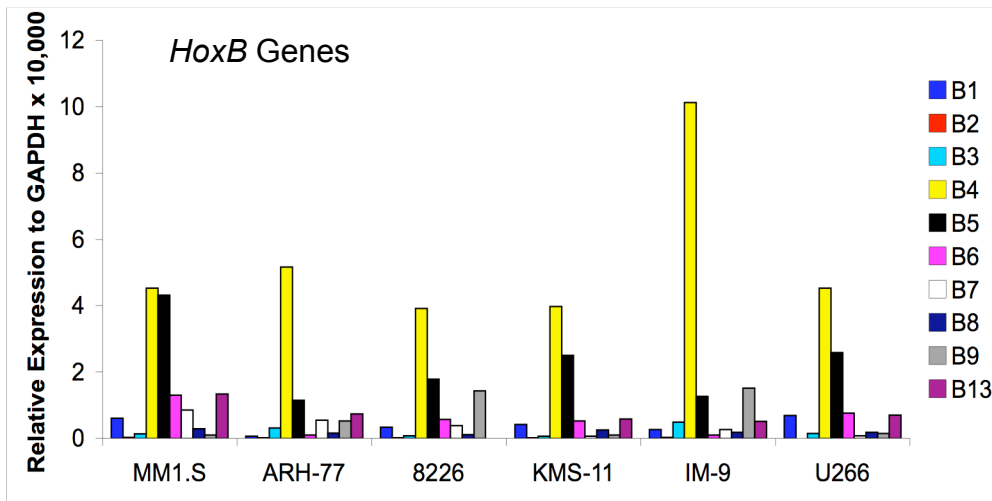

**Figure S1**

Supplement: NIHMS202706-supplement-1.pdf [file NIHMS202706-supplement-1.pdf]

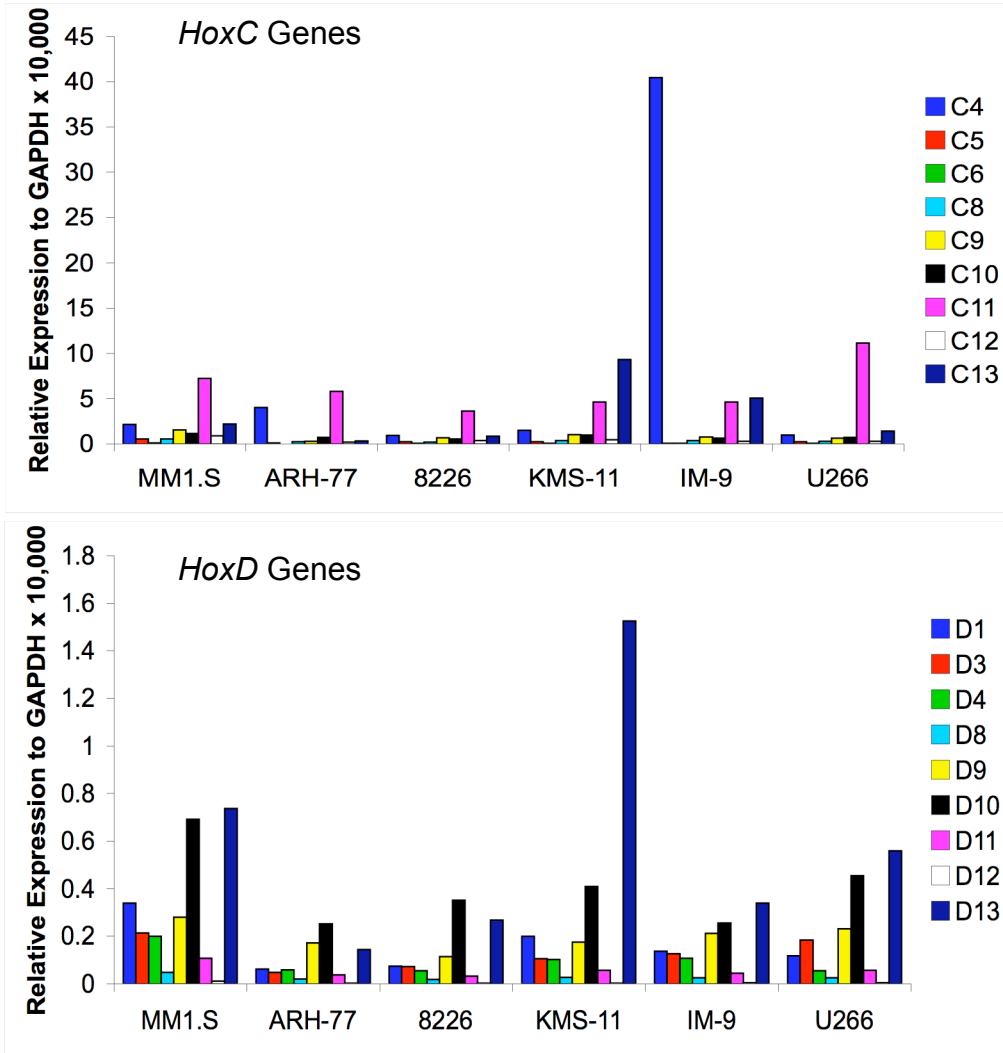

**Figure S2**

Supplement: NIHMS202706-supplement-2.pdf [file NIHMS202706-supplement-2.pdf]

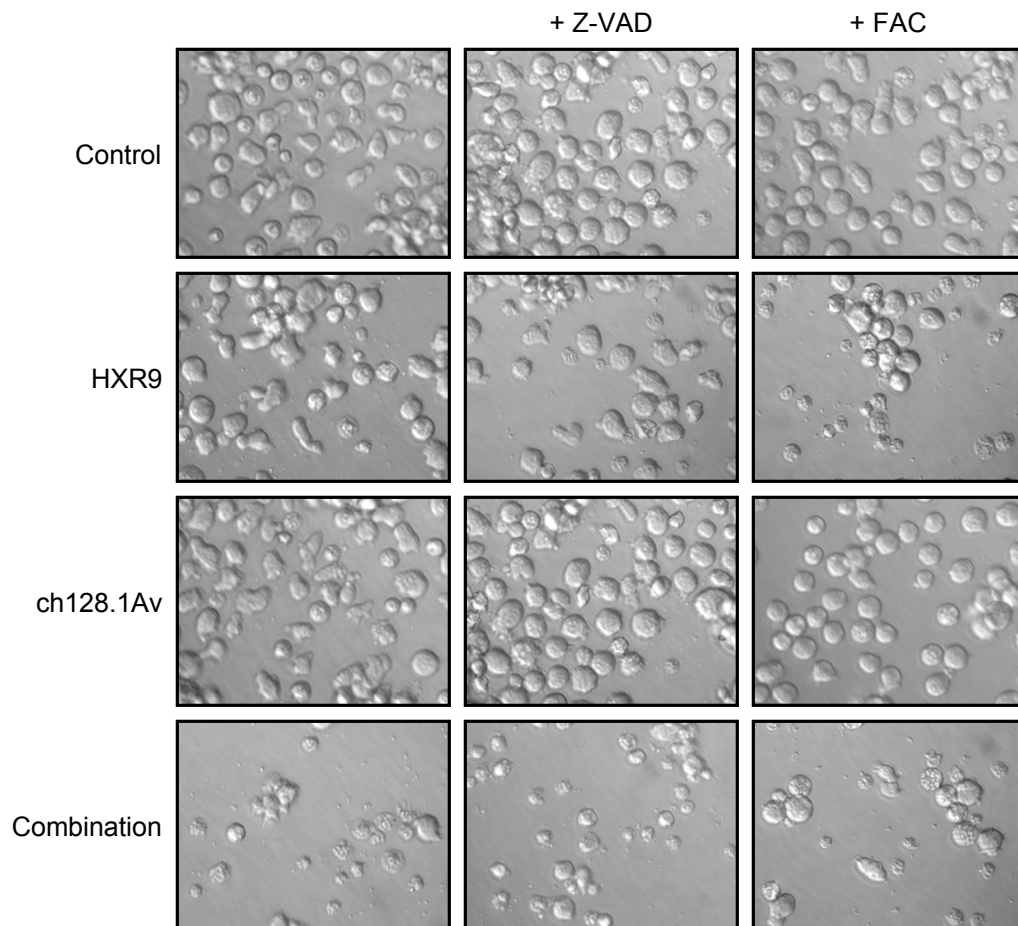

**Figure S4**

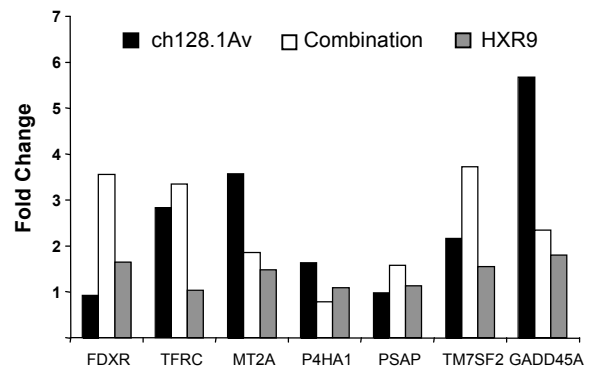

**Figure 7**

Supplement: NIHMS202706-supplement-4.pdf [file NIHMS202706-supplement-4.pdf]
